# Supplementary material
Source: MDPI journal article supplement (https://www.mdpi.com/2073-4433/10/6/343)
Supplement: s1 [file s1]

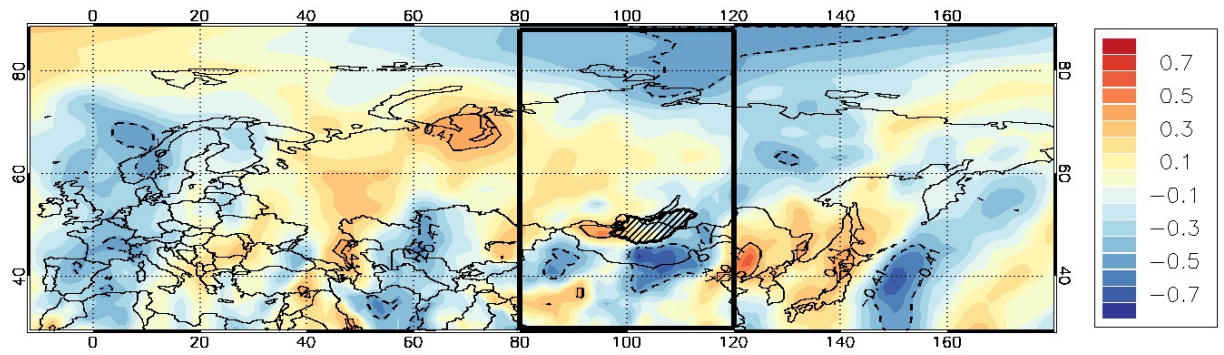

(a)

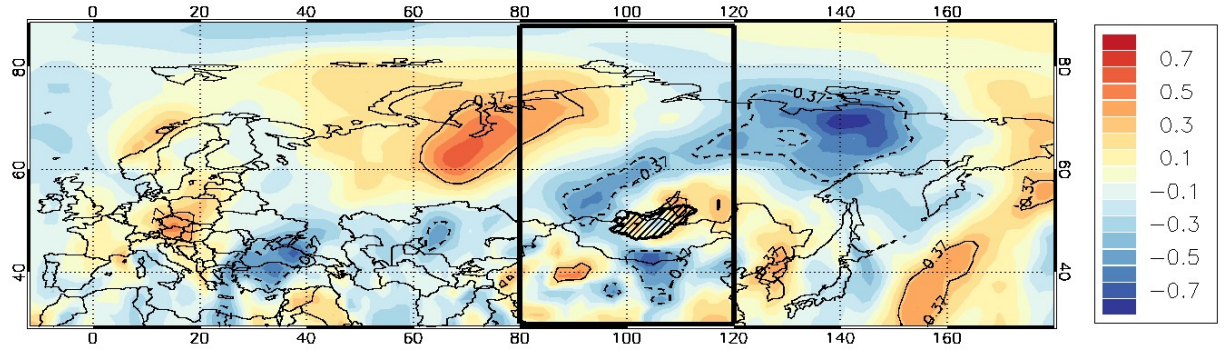

(b)

**Figure 1.** Correlation coefficients of ESM-blocks and V850 for 1979–1995 (a) and 1996–2016 (b). Description is the same as in Figure 8.
